# Supplementary material for: 1-Oleate-2-palmitate-3-linoleate glycerol improves lipid metabolism and gut microbiota and decreases the level of pro-inflammatory cytokines
Source: Royal Society of Chemistry journal article supplement (doi:10.1039/d3fo00723e), 2023-01-01
Supplement: d3fo00723e1.pdf [file d3fo00723e1.pdf]

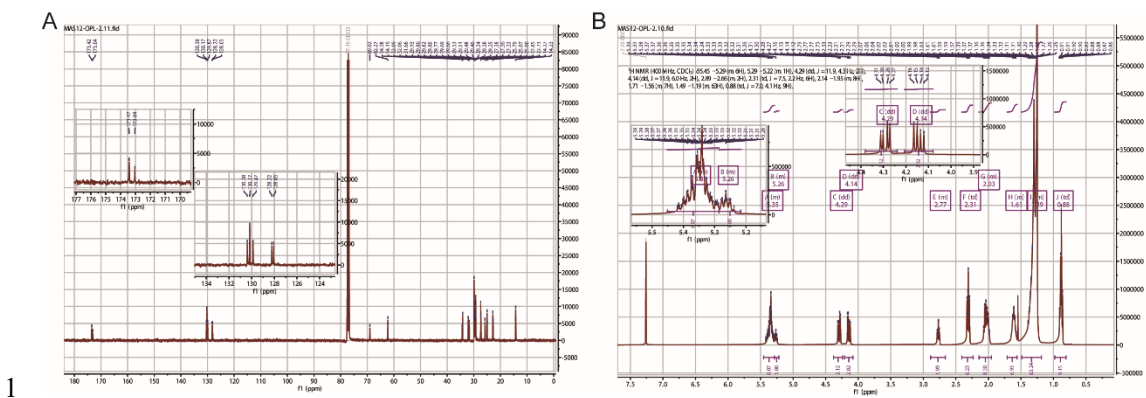

2 Fig. S1 NMR of OPL. A, carbon spectrum; B, hydrogen spectrum.

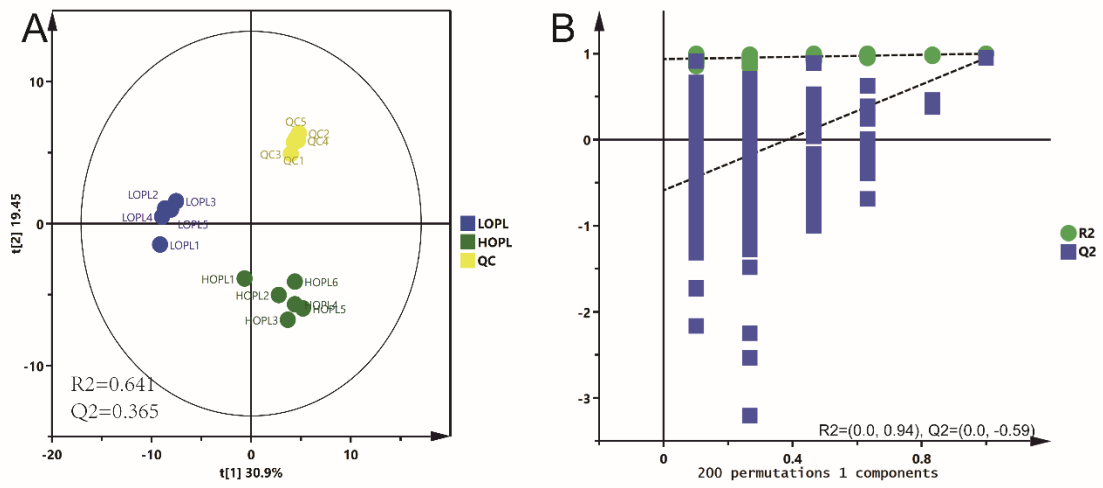

3

4 Fig. S2 PCA and Permutation test for OPLSDA model of LOPL versus HOPL. A, PCA

5 model for LOPL versus HOPL; B, Permutation test for OPLSDA model of LOPL

6 versus HOPL

7

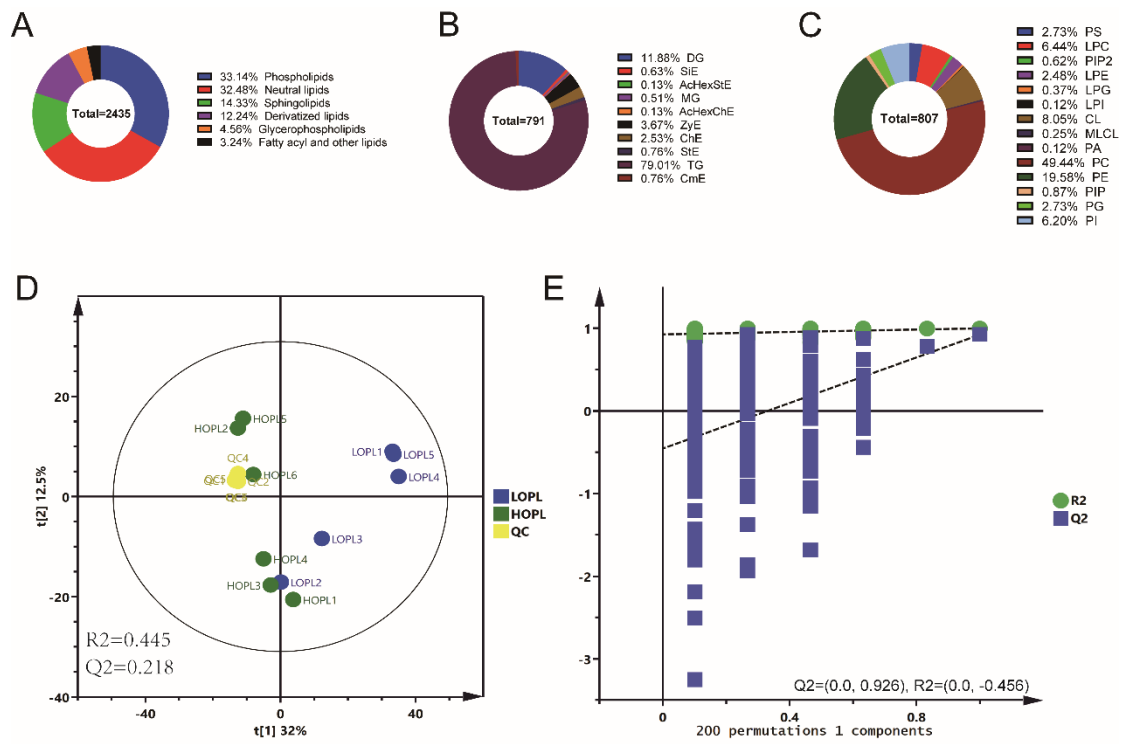

8

9 Fig. S3 Serum lipidomes composition. A-B, serum lipidomes composition; D,

10 Permutation test for OPLS-DA model of LOPL versus HOPL

11

12 Table S1 The constituents of the respective diets

| Diets                 | LOPL    | HOPL    |
|-----------------------|---------|---------|
| Kcal (%)              |         |         |
| Protein               | 20      | 20      |
| Carbohydrates         | 64      | 64      |
| Fats                  | 16      | 16      |
| kcal/gm               | 4.00    | 4.00    |
| Content (g)           |         |         |
| Casein                | 200     | 200     |
| L-cystine             | 3       | 3       |
| Corn starch           | 397.486 | 397.486 |
| Maltodextrin 10       | 132     | 132     |
| Sucrose               | 100     | 100     |
| Cellulose BW200       | 50      | 50      |
| Soybean oil           | 70      | 40      |
| OPL                   | 0       | 30      |
| TBHQ                  | 0.014   | 0.014   |
| Minerals S10022G      | 35      | 35      |
| Vitamin V10037        | 10      | 10      |
| Hydrocholine Tartrate | 2.5     | 2.5     |
| Total                 | 1000    | 1000    |

14 Table S2 Major triglycerides composition of dietary fat (%)

| Dietary fat | LOPL  | HOPL  |
|-------------|-------|-------|
| POP         | 0.51  | 0.29  |
| PLP         | 1.24  | 0.71  |
| SOP         | 0.24  | 0.14  |
| OPO         | 1.35  | 2.89  |
| SLP         | 2.23  | 1.27  |
| OPL         | 8.33  | 44.57 |
| LLP         | 13.95 | 8.56  |
| OOO         | 2.61  | 1.49  |
| SLO         | 2.28  | 1.30  |
| OOL         | 7.48  | 4.27  |
| LnLP        | 3.23  | 1.90  |
| SLL         | 2.77  | 1.75  |
| OLL         | 21.5  | 13.85 |
| LLL         | 23.15 | 11.24 |
| LLLn        | 8.20  | 4.55  |
| LLnLn       | 0.80  | 0.40  |

15

16

17 Table S3 Primer sequences used for semi-quantitative RT-PCR analysis

|                | Forward primer           | Reverse primer         |
|----------------|--------------------------|------------------------|
| IL-1 $\beta$   | TGACGGACCCCAAAGATGA      | TCTCCACAGCCACAATGAGT   |
| TNF- $\alpha$  | CCCTCACACTCAGATCATCTTCT  | CTACGACGTGGGCTACAG     |
| IL-6           | GATGCTACCAAAGTGGATATAATC | GGTCCTTAGCCACTCCTTCTG  |
| $\beta$ -actin | CTACCTCATGAAGATCCTGACC   | CACAGCTTCTCTTTGATGTCAC |
